# Supplementary material
Source: PubMed Central journal article supplement (PMC2268794)

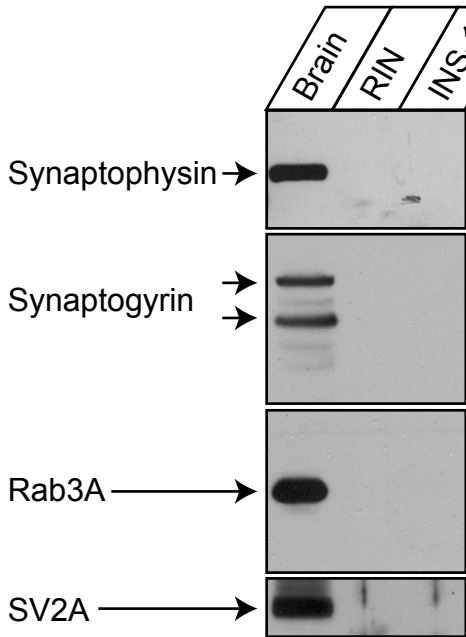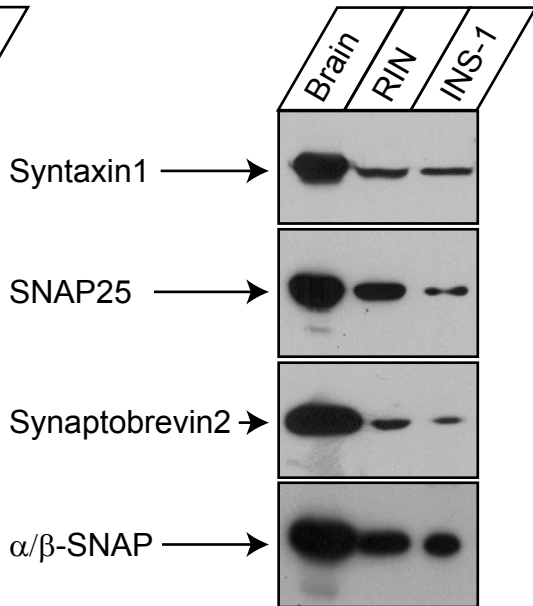

Supplement: pnas_0711700105_2.pdf [file pnas_0711700105_2.pdf]

Relative mRNA Levels

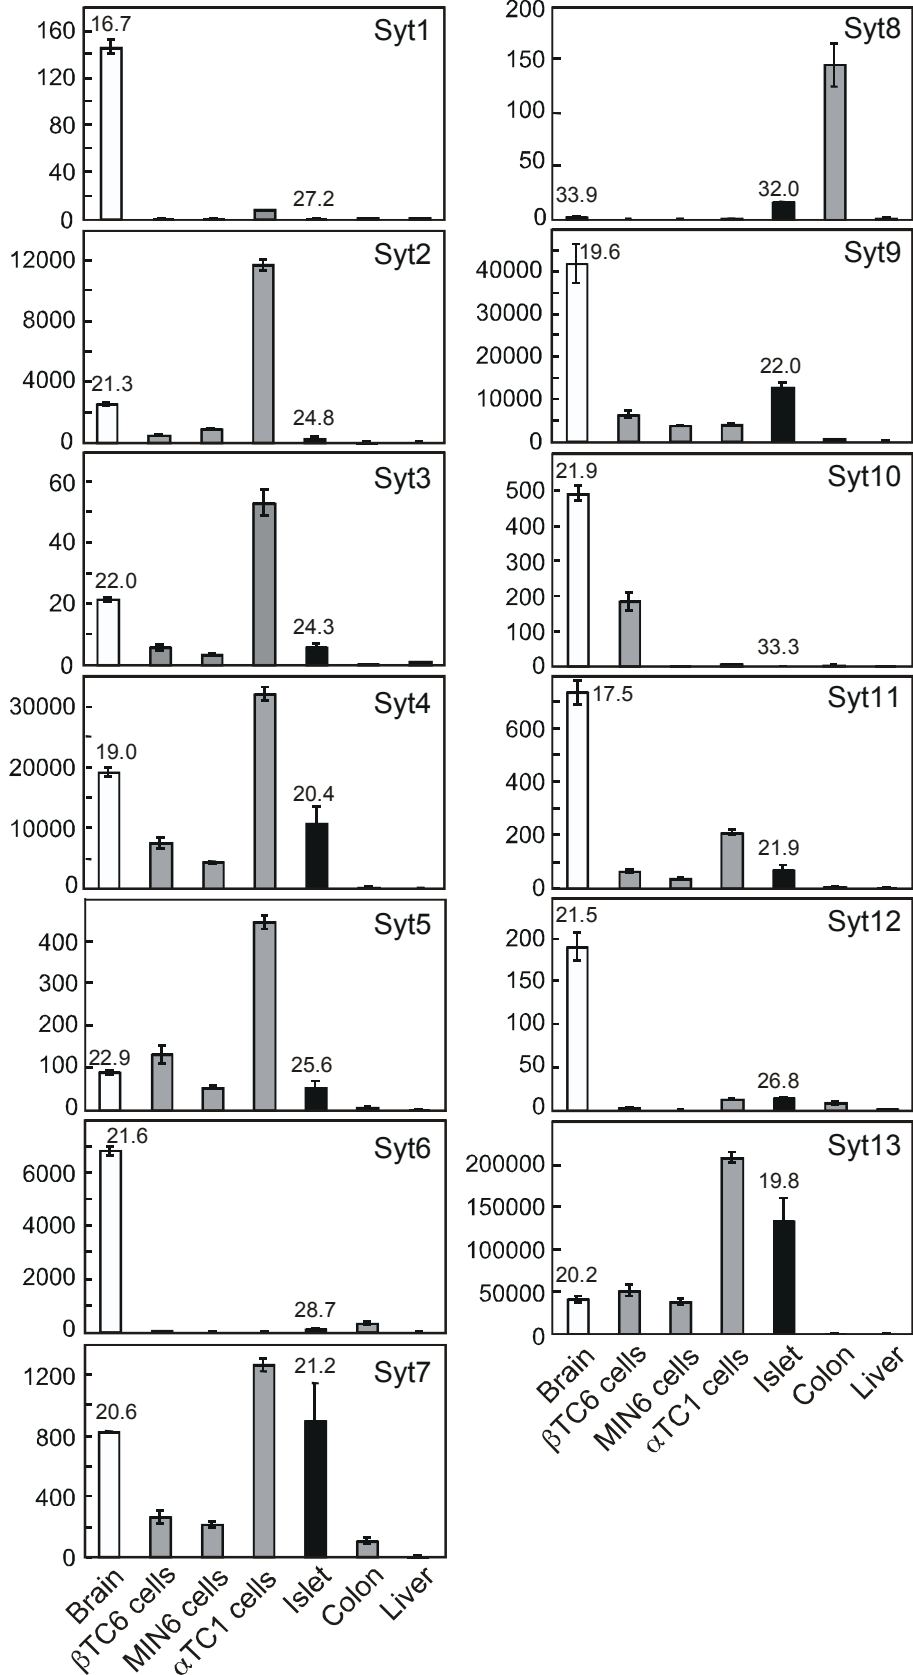

Supplement: pnas_0711700105_3.pdf [file pnas_0711700105_3.pdf]

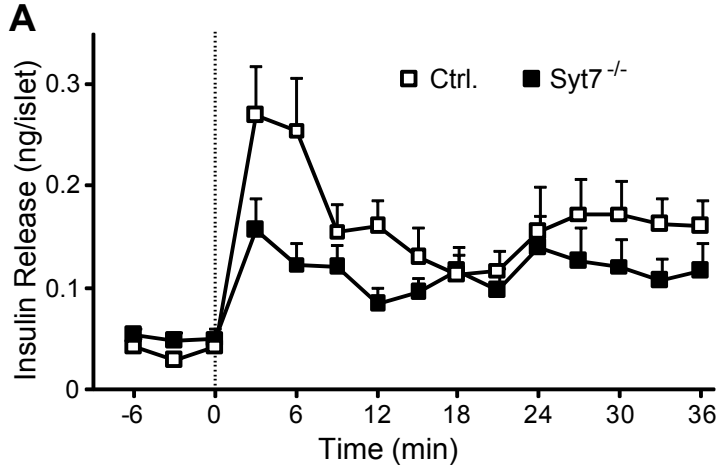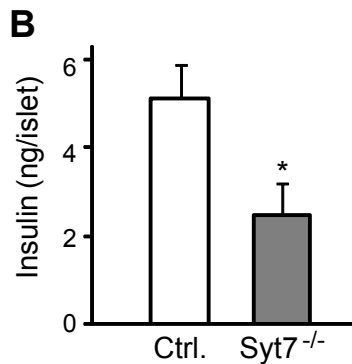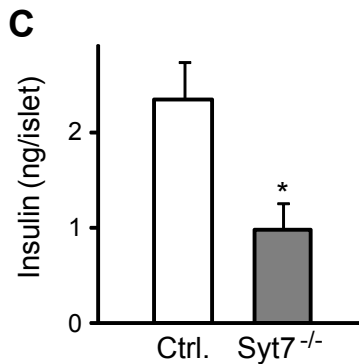

Supplement: pnas_0711700105_4.pdf [file pnas_0711700105_4.pdf]
